# Supplementary material for: Sodium Pre-Intercalation-Based Na3-δ-MnO2@CC for High-Performance Aqueous Asymmetric Supercapacitor: Joint Experimental and DFT Study
Source: MDPI journal article supplement (doi:10.3390/nano12162856), 2022-08-18
Supplement: s1 [file s1]

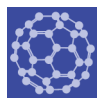

# Sodium Pre-Intercalation-Based Na<sub>3</sub>-δ-MnO<sub>2</sub>@CC for High-Performance Aqueous Asymmetric Supercapacitor: Joint Experimental and DFT Study

Anis Ur Rahman <sup>1</sup>, Nighat Zarshad <sup>2</sup>, Wu Jianghua <sup>3</sup>, Muslim Shah <sup>4</sup>, Sana Ullah <sup>4</sup>, Guigen Li <sup>1,5,\*</sup>, Muhammad Tariq <sup>6</sup> and Asad Ali <sup>4,\*</sup>

<sup>1</sup> Institute of Chemistry and BioMedical Sciences, School of Chemistry and Chemical Engineering, Nanjing University, Nanjing 210023, China

<sup>2</sup> Department of Polymer Science, School of Chemistry and Chemical Engineering, Southeast University, Nanjing 211189, China

<sup>3</sup> National Laboratory of Solid State Microstructures, Collaborative Innovation Center of Advanced Microstructures and College of Engineering and Applied Sciences, Nanjing University, Nanjing 210093, China

<sup>4</sup> Department of Chemistry, Faculty of Chemical and Life Sciences, Abdul Wali Khan University, Mardan KPK, 23200, Pakistan

<sup>5</sup> Department of Chemistry and Biochemistry, Texas Tech University, Lubbock, TX 79409, USA

<sup>6</sup> Department of PCB, Bayazid Rokhan Institute of Higher Studies, Kabul Jalalabad 1002, Afghanistan

\* Correspondence: guigen.li@ttu.edu (G.L.); asadali@awkum.edu.pk (A.A.)

The mass balance of cathode and anode is obtained from the following charge balance formula,

$$\frac{m_+}{m_-} = \frac{C_- \times \Delta E_-}{C_+ \times \Delta E_+} \quad (S1)$$

In above equation

m is the mass of the cathode and anode.

C is the specific capacitance.

ΔE (V) is the potential window of a single electrode and the subscript + and – are cathode and anode respectively.

The specific capacitance of the electrode was calculated by Equation (S2).

$$C = \frac{I \Delta t}{m \Delta V} \quad (S2)$$

Where

I (A) is the discharge current.

Δt (s) is the discharge time

m (g) is the mass of the active material.

ΔV (V) is the potential window of the discharge.

The energy density (E, Wh kg<sup>-1</sup>) and power density (P, W kg<sup>-1</sup>) of the asymmetric supercapacitor can be obtained by Equations (S3) and (S4).

$$E = \frac{1}{2} \frac{C (\Delta V)^2}{3.6} \quad (S3)$$

$$P = \frac{E_D \times 3600}{\Delta t} \quad (S4)$$

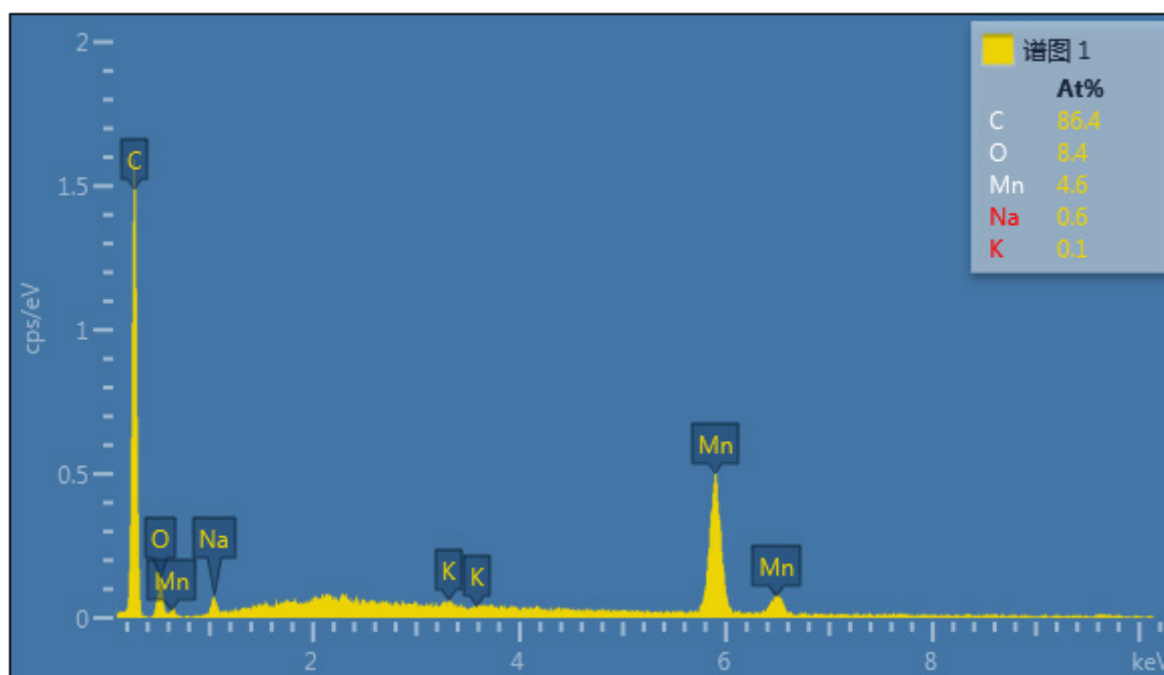

Figure S1. EDS elemental mapping of  $\text{Na}_3\text{-MnO}_2$ .

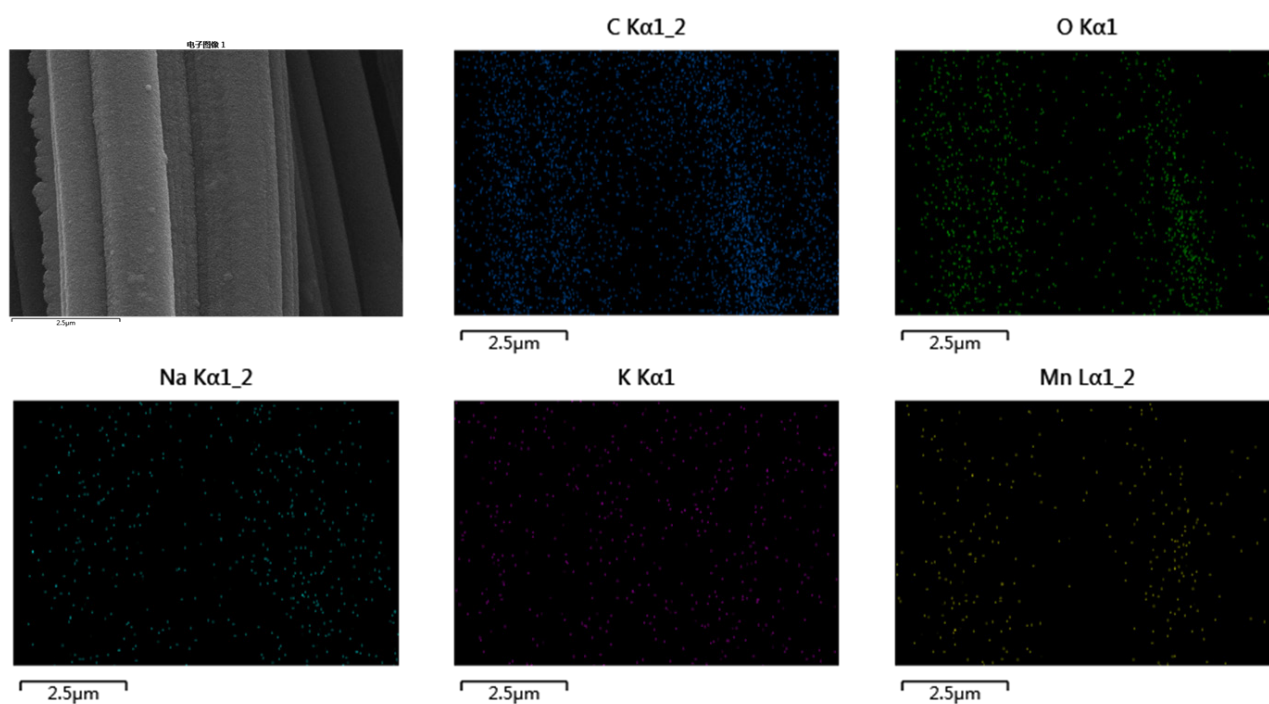

Figure S2. EDS mapping of  $\text{Na}_3\text{-MnO}_2$ .

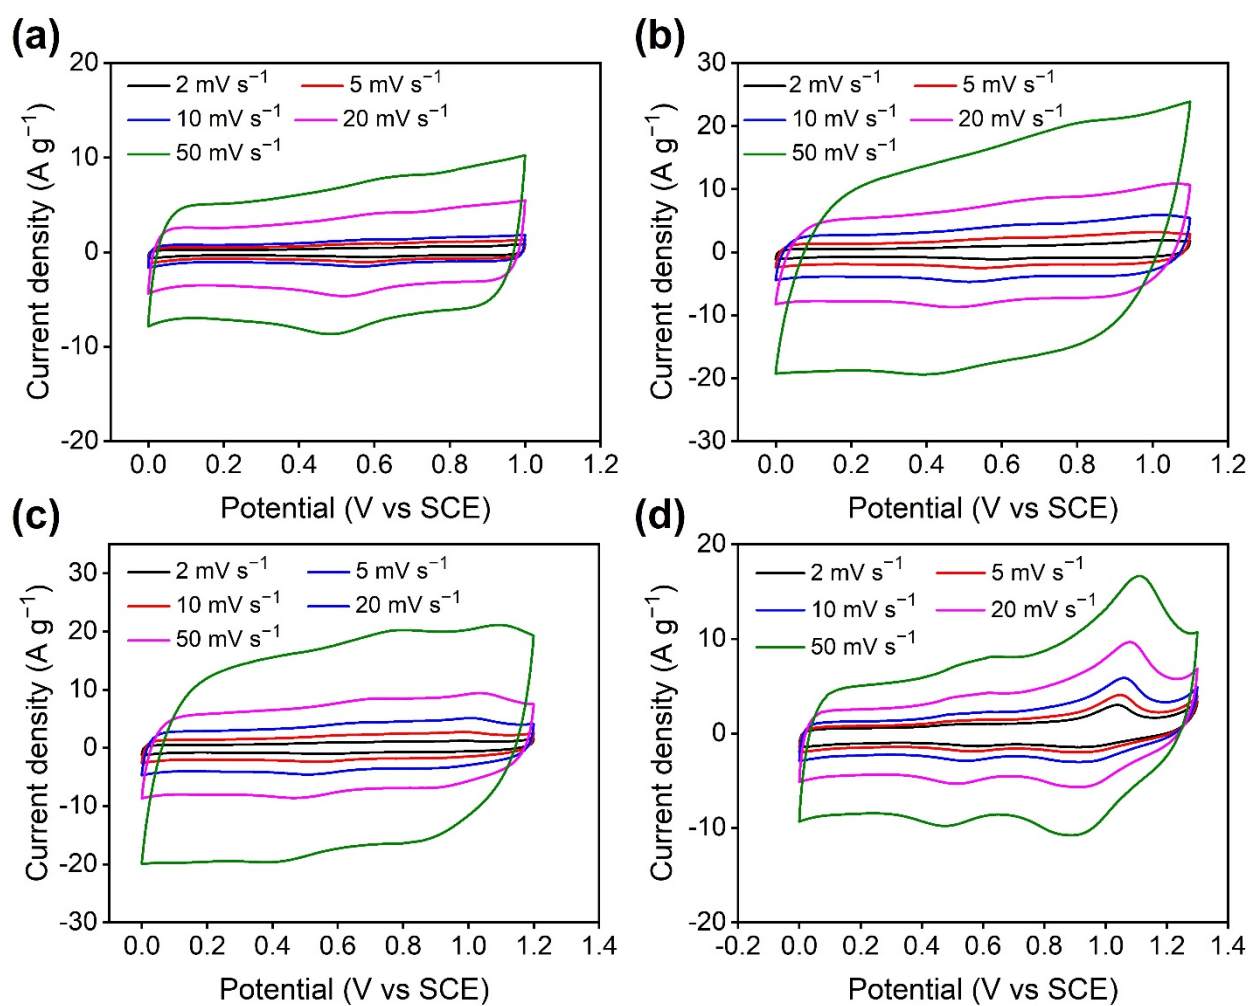

**Figure S3.** The CV of  $\text{Na}_3\text{-MnO}_2$  at a scan rate of 1, 2, 5, 10, 20, and 50  $\text{mV s}^{-1}$  in different working potential windows of (a) 0–1.0 V (b) 0–1.1 V; (c) 0–1.2 V; and (d) 0–1.3 V.

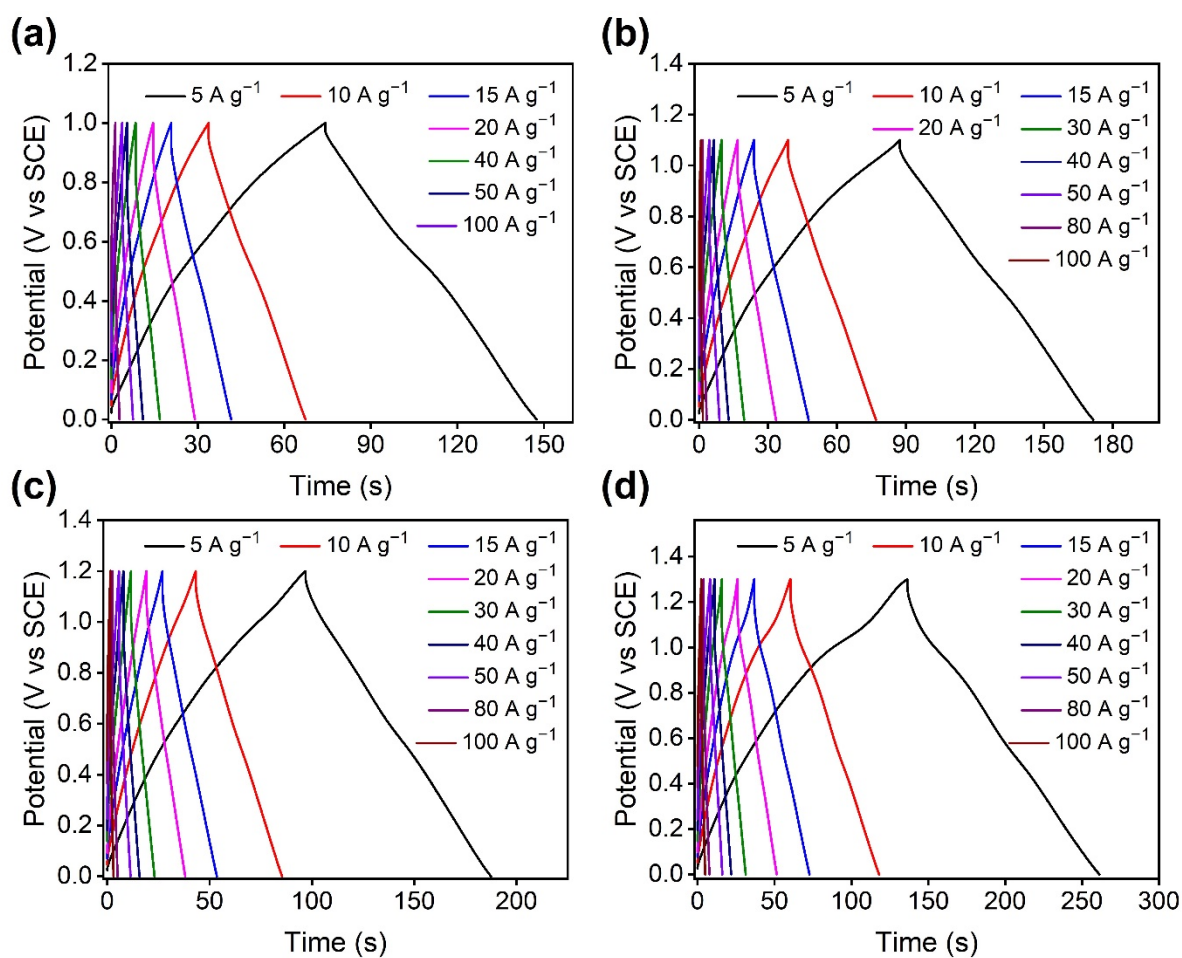

**Figure S4.** The GCD of  $\text{Na}_3\text{-MnO}_2$  at various current densities of 5, 10, 15, 20, 30, 40, 50, 80 and 100  $\text{A g}^{-1}$  in different working potential windows of (a) 0–1.0 V (b) 0–1.1V; (c) 0–1.2 V; and (d) 0–1.3 V.

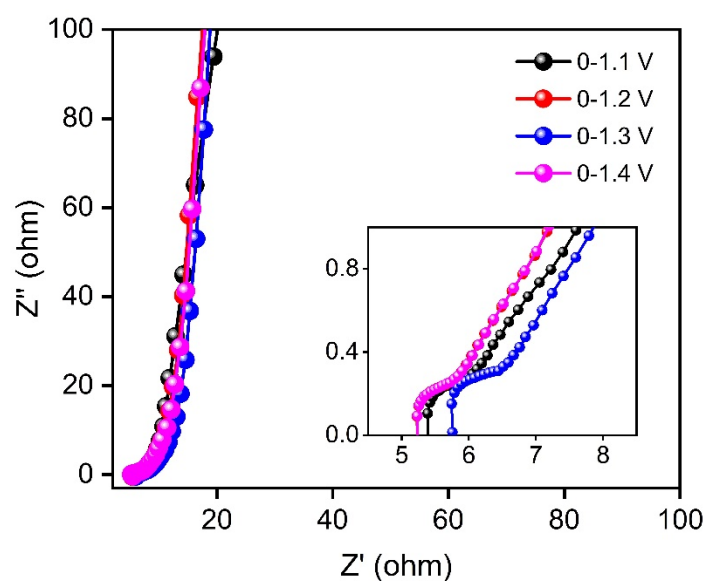

**Figure S5.** Nyquist plots recorded at 100 kHz to 10 MHz of  $\text{Na}_3\text{-MnO}_2$  at different working potential windows.

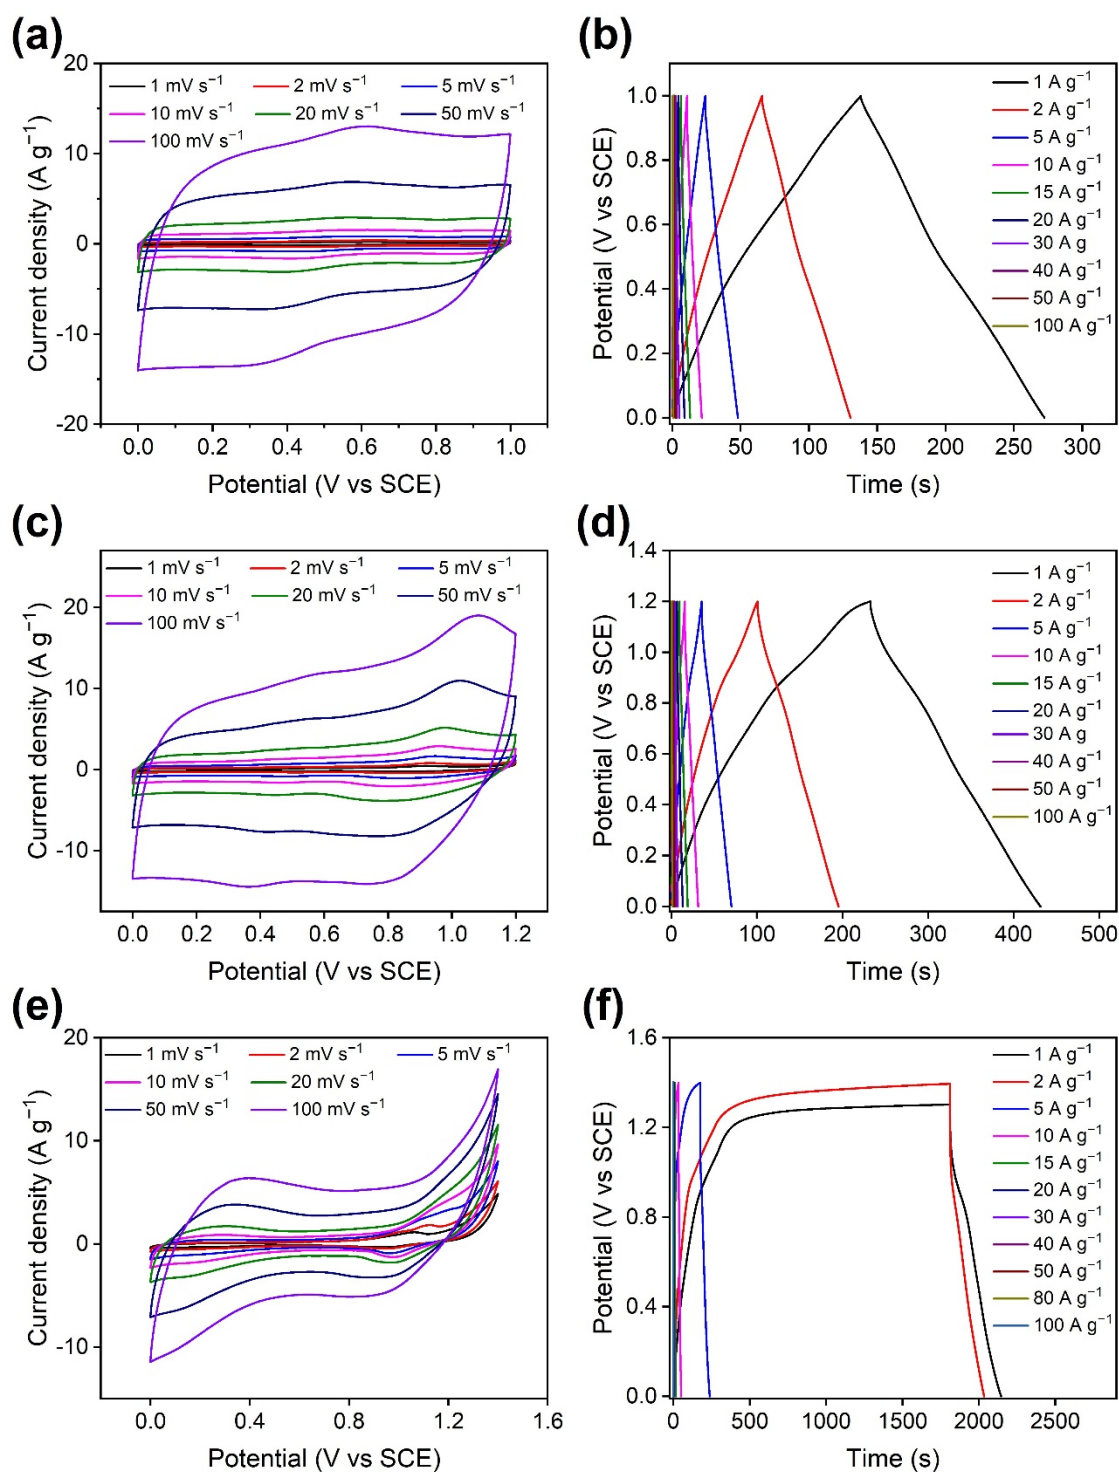

**Figure S6.** Electrochemical performance of the of MnO<sub>2</sub> without Na ions; CV at a scan rate of 1, 2, 5, 10, 20, 50 and 100 mV s<sup>-1</sup> in different working potential windows (a) 0-1.0 V; (c) 0-1.2 V; (e) 0-1.4 V; GCD curves at a various current density of 1, 2, 5, 10, 15, 20, 30, 40, 50, 80 and 100 A g<sup>-1</sup> in different working potential windows of (b) 0-1.0 V; (d) 0-1.2 V and (f) 0-1.4 V.

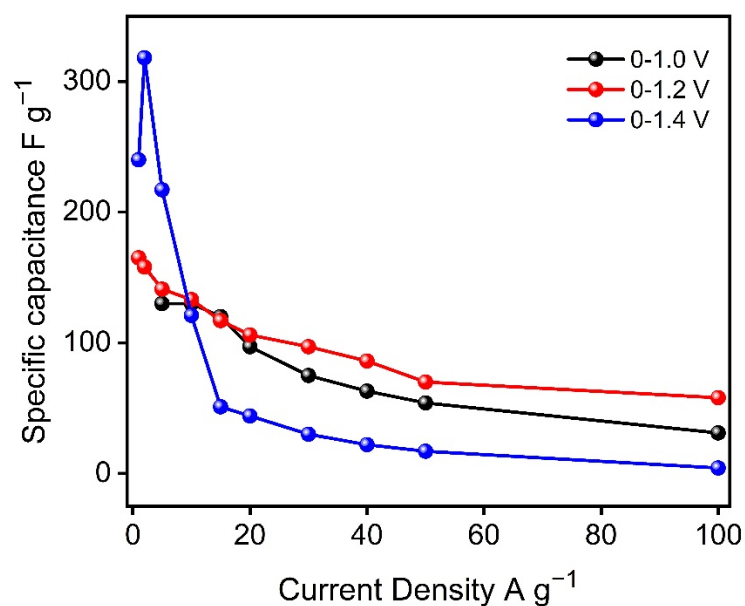

**Figure S7.** comparison of specific capacitance of MnO<sub>2</sub> electrode at different potential window of 0-1.0, 0-1.2, and 0-1.4 V as function of current density.

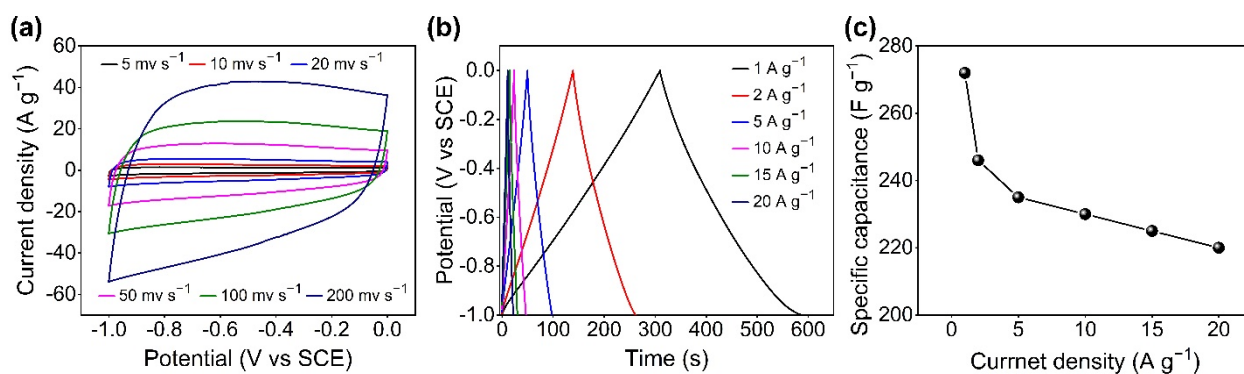

**Figure S8.** the electrochemical performance of AC was recorded in the three-electrode system; (a) CV of the at a scan rate of 10-200 mV s<sup>-1</sup> in 0-1.0 V; (b) GC of the at a current density of 1-20 A g<sup>-1</sup> in 0-1.0 V; (c) specific capacitance as a function of current density.



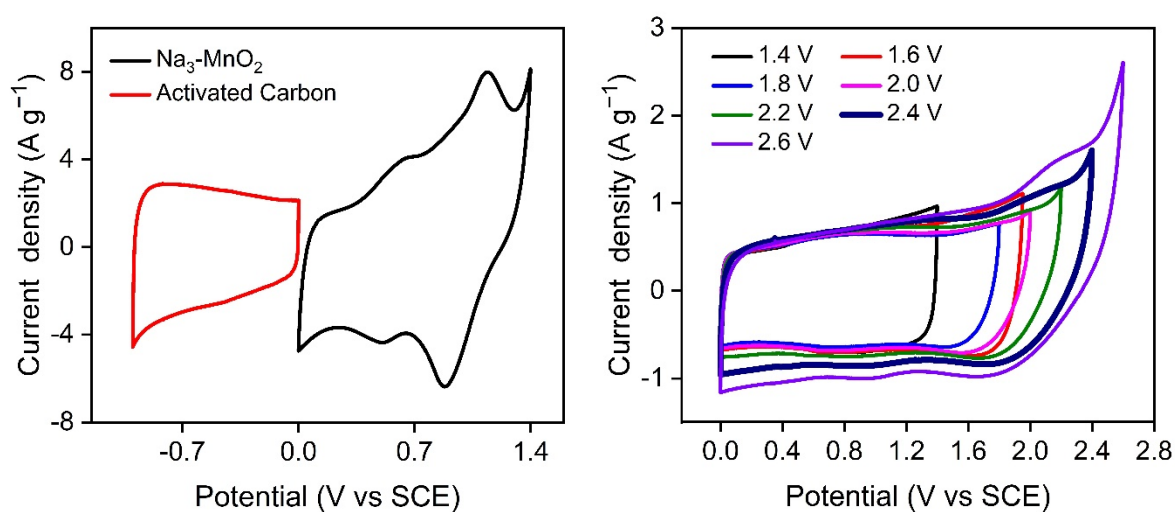

**Figure S9.** Comparison of CV curves of  $\text{Na}_3\text{-MnO}_2$  electrode and N-AC in their separate potential windows of 1.4-0 V and 0-1.0 V respectively at a scan rate of  $10 \text{ mV s}^{-1}$ ; (b) CV curves at different potential windows from 1.6 to 2.6 V were recorded at a scan rate of  $10 \text{ mV s}^{-1}$ .

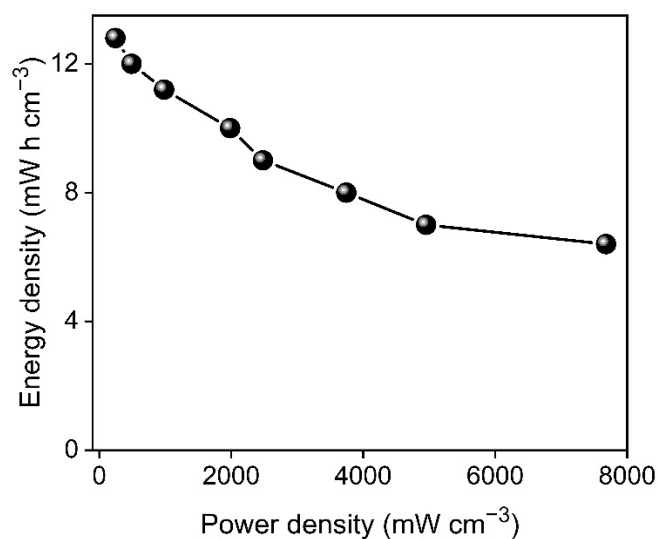

**Figure S10.** Ragone plots of  $\text{Na}_3\text{-MnO}_2$  //N-AC device volumetric energy and power density.

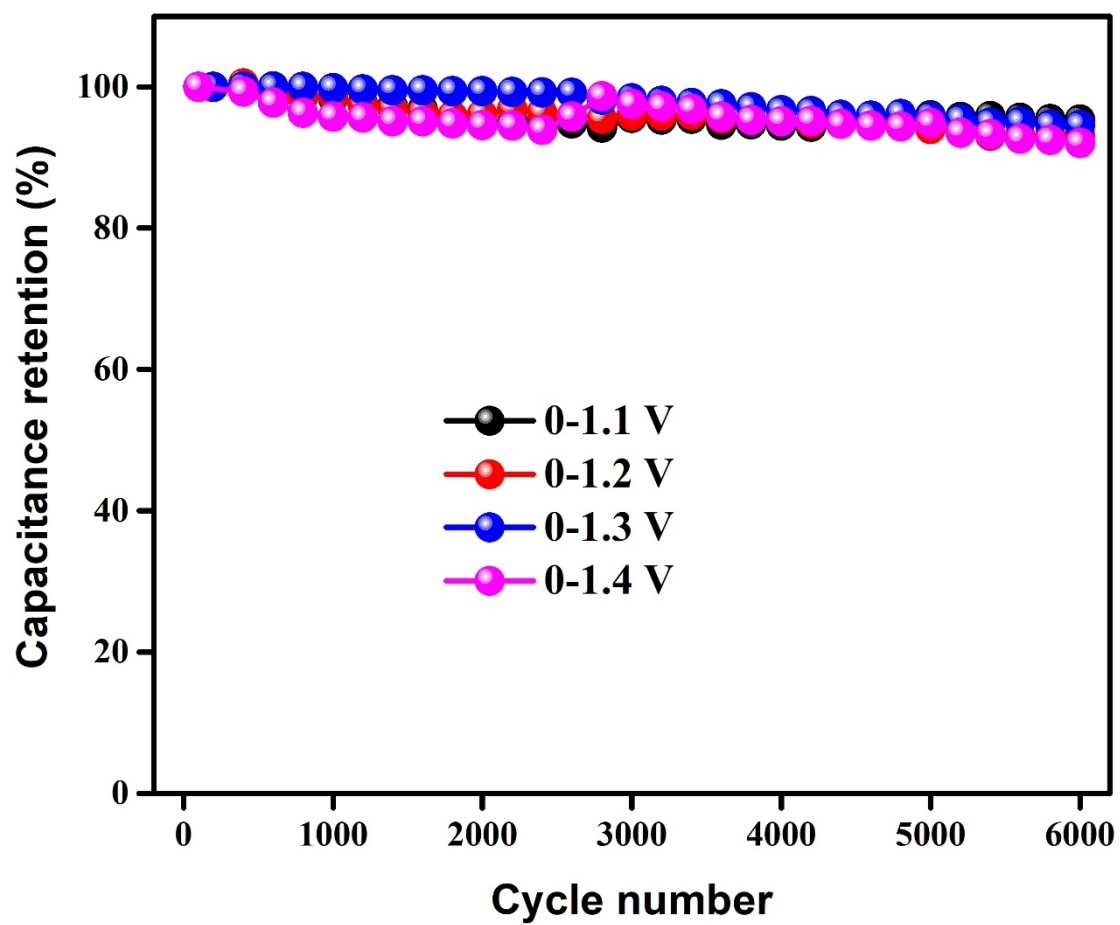

**Figure S11.** Cycling performance comparison at potential window of 0-1.0, 0-1.1, 0-1.2, 0-1.3, and 0-1.4 V.
